# Supplementary material
Source: PubMed Central journal article supplement (PMC8097427)
Supplement: AAC.01699-20-s0001.pdf [file AAC.01699-20-s0001.pdf]

# Supplemental materials

## 1 References for antibiotic concentrations rationales

Table 1. Antibiotics experimental concentrations and rationales.

| Antibiotic         | Concentration (mg/L) | Rationale                             | References                                                                                                                                                                                                                                                                                                                                                                                                                                                                                           |
|--------------------|----------------------|---------------------------------------|------------------------------------------------------------------------------------------------------------------------------------------------------------------------------------------------------------------------------------------------------------------------------------------------------------------------------------------------------------------------------------------------------------------------------------------------------------------------------------------------------|
| Daptomycin (DAP)   | 30                   | $\frac{AUC_{0-24h}}{24h}$             | European Committee on Antimicrobial Susceptibility Testing. (2005a). Daptomycin: Rationale for the EUCAST clinical breakpoints, version 1.0. In: <a href="http://www.eucast.org">http://www.eucast.org</a> .<br>Dvorchik, B. H., Brazier, D., DeBruin, M. F., & Arbeit, R. D. (2003). Daptomycin pharmacokinetics and safety following administration of escalating doses once daily to healthy subjects. <i>Antimicrob Agents Chemother</i> , 47(4), 1318-1323. doi:10.1128/aac.47.4.1318-1323.2003 |
| Doxycycline (DOX)  | 1.5                  | $\frac{AUC_{0-24h}}{24h}$             | European Committee on Antimicrobial Susceptibility Testing. (2009a). Doxycycline: Rationale for the EUCAST clinical breakpoints, version 1.0. In: <a href="http://www.eucast.org">http://www.eucast.org</a> .                                                                                                                                                                                                                                                                                        |
| Linezolid (LZD)    | 5                    | C <sub>min</sub>                      | European Committee on Antimicrobial Susceptibility Testing. (2005b). Linezolid: Rationale for the EUCAST clinical breakpoints, version 1.0. In: <a href="http://www.eucast.org">http://www.eucast.org</a> .                                                                                                                                                                                                                                                                                          |
| Moxifloxacin (MXF) | 1.5                  | $\frac{AUC_{0-24h}}{24h}$             | European Committee on Antimicrobial Susceptibility Testing. (2007b). Moxifloxacin: Rationale for the EUCAST clinical breakpoints, version 2.3. In: <a href="http://www.eucast.org">http://www.eucast.org</a> .                                                                                                                                                                                                                                                                                       |
| Rifampin (RIF)     | 2.5                  | $\frac{AUC_{0-24h}}{24h}$             | European Committee on Antimicrobial Susceptibility Testing. (2010b). Rifampicin: Rationale for the EUCAST clinical breakpoints, version 1.0. In: <a href="http://www.eucast.org">http://www.eucast.org</a> .                                                                                                                                                                                                                                                                                         |
| Vancomycin (VAN)   | 2                    | Target trough concentration (20 mg/L) | European Committee on Antimicrobial Susceptibility Testing. (2010c). Vancomycin: Rationale for the EUCAST clinical breakpoints, version 2.1. In: <a href="http://www.eucast.org">http://www.eucast.org</a> .<br>Osmon, D. R., Berbari, E. F., Berendt, A. R., Lew, D., Zimmerli, W., Steckelberg, J. M., . . . Infectious Diseases Society of, A. (2013). Diagnosis and management of prosthetic joint infection: clinical practice guidelines by the Infectious Diseases                            |

European Committee on Antimicrobial Susceptibility Testing. (2010). Ceftazidime: Rationale for the EUCAST clinical breakpoints, version 1.0. In: <http://www.eucast.org>.

|                     |       |                           |                                                                                                                                                                                                                                                              |
|---------------------|-------|---------------------------|--------------------------------------------------------------------------------------------------------------------------------------------------------------------------------------------------------------------------------------------------------------|
| Ceftazidime (CEF)   | 3.8   | $C_{\min}$                | Luthy, R., Blaser, J., Bonetti, A., Simmen, H., Wise, R., & Siegenthaler, W. (1981). Comparative multiple-dose pharmacokinetics of cefotaxime, moxalactam, and ceftazidime. <i>Antimicrob Agents Chemother</i> , 20(5), 567-575.<br>doi:10.1128/aac.20.5.567 |
| Ciprofloxacin (CIP) | 1.625 | $\frac{AUC_{0-24h}}{24h}$ | European Committee on Antimicrobial Susceptibility Testing. (2007a). Ciprofloxacin: Rationale for the EUCAST clinical breakpoints, version 1.9. In: <a href="http://www.eucast.org">http://www.eucast.org</a> .                                              |
| Colistin (CST)      | 2.5   | $\frac{AUC_{0-24h}}{24h}$ | European Committee on Antimicrobial Susceptibility Testing. (2010a). Colistin: Rationale for the EUCAST clinical breakpoints, version 1.0. In: <a href="http://www.eucast.org">http://www.eucast.org</a> .                                                   |
| Meropenem (MEM)     | 0.25  | $C_{\min}$                | European Committee on Antimicrobial Susceptibility Testing. (2009b). Meropenem: Rationale for the EUCAST clinical breakpoints, version 1.5. In: <a href="http://www.eucast.org">http://www.eucast.org</a> .                                                  |

---

## 2 Selected post-hoc comparisons

Table 2. ATCC 33591 (MRSA). Log<sub>10</sub> CFU counts. Tukey HSD results.

| Comparisons                 | Differences | 95% confidence intervals |       | Adjusted p values |      |
|-----------------------------|-------------|--------------------------|-------|-------------------|------|
|                             |             | Lower                    | Upper |                   |      |
| CDD:T0-Control:T0           | -2.04       | -3.25                    | -0.83 | 0.00004           | **** |
| Control:TGN-Control:T0      | 0.67        | -0.54                    | 1.88  | 0.78924           | NS   |
| CDD:TGN-Control:T0          | 0.56        | -0.65                    | 1.77  | 0.93022           | NS   |
| Control:VAN 20-Control:T0   | 0.90        | -0.40                    | 2.21  | 0.46604           | NS   |
| CDD:VAN 20-Control:T0       | -3.32       | -4.63                    | -2.02 | 0.00000           | **** |
| Control:RIF 2.5-Control:T0  | -1.59       | -2.89                    | -0.28 | 0.00620           | **   |
| CDD:RIF 2.5-Control:T0      | -3.42       | -4.73                    | -2.12 | 0.00000           | **** |
| Control:LIN 5-Control:T0    | -1.50       | -2.81                    | -0.20 | 0.01196           | *    |
| CDD:LIN 5-Control:T0        | -4.02       | -5.32                    | -2.71 | 0.00000           | **** |
| Control:MXF 1.5-Control:T0  | -0.31       | -1.62                    | 0.99  | 0.99992           | NS   |
| CDD:MXF 1.5-Control:T0      | -4.18       | -5.48                    | -2.87 | 0.00000           | **** |
| Control:DAP 30-Control:T0   | -4.99       | -6.30                    | -3.69 | 0.00000           | **** |
| CDD:DAP 30-Control:T0       | -6.05       | -7.36                    | -4.75 | 0.00000           | **** |
| CDD:TGN-Control:TGN         | -0.11       | -1.32                    | 1.10  | 1.00000           | NS   |
| CDD:VAN 20-Control:VAN 20   | -4.22       | -5.62                    | -2.83 | 0.00000           | **** |
| CDD:RIF 2.5-Control:RIF 2.5 | -1.83       | -3.23                    | -0.44 | 0.00223           | **   |
| CDD:LIN 5-Control:LIN 5     | -2.51       | -3.91                    | -1.12 | 0.00001           | **** |
| CDD:MXF 1.5-Control:MXF 1.5 | -3.87       | -5.26                    | -2.47 | 0.00000           | **** |
| CDD:DAP 30-Control:DAP 30   | -1.06       | -2.45                    | 0.34  | 0.31803           | NS   |

Table 3. ATCC 33591 (MRSA). Biomass assay (% of T0 control). Tukey HSD results.

| Comparisons                 | Differences | 95% confidence intervals |       | Adjusted p values |      |
|-----------------------------|-------------|--------------------------|-------|-------------------|------|
|                             |             | Lower                    | Upper |                   |      |
| CDD:T0-Control:T0           | -95.2       | -113.7                   | -76.6 | 0                 | **** |
| Control:TGN-Control:T0      | 24.4        | 5.9                      | 43.0  | 0.00213           | ***  |
| CDD:TGN-Control:T0          | 5.3         | -13.3                    | 23.9  | 0.99933           | NS   |
| Control:VAN 20-Control:T0   | 22.2        | 2.2                      | 42.3  | 0.01804           | *    |
| CDD:VAN 20-Control:T0       | -89.6       | -109.7                   | -69.5 | 0                 | **** |
| Control:RIF 2.5-Control:T0  | 7.8         | -12.3                    | 27.8  | 0.98545           | NS   |
| CDD:RIF 2.5-Control:T0      | -88.6       | -108.6                   | -68.5 | 0.00000           | **** |
| Control:LIN 5-Control:T0    | 13.3        | -6.8                     | 33.4  | 0.53801           | NS   |
| CDD:LIN 5-Control:T0        | -95.4       | -115.5                   | -75.4 | 0.00000           | **** |
| Control:MXF 1.5-Control:T0  | 21.8        | 1.7                      | 41.8  | 0.02281           | *    |
| CDD:MXF 1.5-Control:T0      | -85.8       | -105.9                   | -65.7 | 0.00000           | **** |
| Control:DAP 30-Control:T0   | -20.2       | -38.8                    | -1.6  | 0.02187           | *    |
| CDD:DAP 30-Control:T0       | -87.7       | -106.3                   | -69.1 | 0.00000           | **** |
| CDD:TGN-Control:TGN         | -19.1       | -37.7                    | -0.5  | 0.03864           | *    |
| CDD:VAN 20-Control:VAN 20   | -111.8      | -133.3                   | -90.4 | 0                 | **** |
| CDD:RIF 2.5-Control:RIF 2.5 | -96.3       | -117.8                   | -74.9 | 0                 | **** |
| CDD:LIN 5-Control:LIN 5     | -108.8      | -130.2                   | -87.3 | 0                 | **** |
| CDD:MXF 1.5-Control:MXF 1.5 | -107.5      | -129.0                   | -86.1 | 0                 | **** |
| CDD:DAP 30-Control:DAP 30   | -67.5       | -86.0                    | -48.9 | 0                 | **** |

Table 4. ATCC 35984 (MRSE). Log<sub>10</sub> CFU counts. Tukey HSD results.

| Comparisons                 | Differences | 95% confidence intervals |       | Adjusted p values |      |
|-----------------------------|-------------|--------------------------|-------|-------------------|------|
|                             |             | Lower                    | Upper |                   |      |
| CDD:T0-Control:T0           | -2.54       | -3.85                    | -1.24 | 0.00000           | **** |
| Control:TGN-Control:T0      | 0.59        | -0.72                    | 1.89  | 0.95620           | NS   |
| CDD:TGN-Control:T0          | 1.16        | -0.15                    | 2.46  | 0.13330           | NS   |
| Control:VAN 20-Control:T0   | 1.84        | 0.54                     | 3.15  | 0.00071           | ***  |
| CDD:VAN 20-Control:T0       | -5.00       | -6.30                    | -3.69 | 0.00000           | **** |
| Control:RIF 2.5-Control:T0  | -3.39       | -4.69                    | -2.08 | 0.00000           | **** |
| CDD:RIF 2.5-Control:T0      | -6.10       | -7.41                    | -4.80 | 0.00000           | **** |
| Control:LIN 5-Control:T0    | -0.62       | -1.92                    | 0.69  | 0.93571           | NS   |
| CDD:LIN 5-Control:T0        | -3.39       | -4.69                    | -2.08 | 0.00000           | **** |
| Control:MXF 1.5-Control:T0  | -2.52       | -3.83                    | -1.22 | 0.00000           | **** |
| CDD:MXF 1.5-Control:T0      | -5.09       | -6.40                    | -3.79 | 0.00000           | **** |
| Control:DAP 30-Control:T0   | -3.50       | -4.80                    | -2.19 | 0.00000           | **** |
| CDD:DAP 30-Control:T0       | -5.45       | -6.75                    | -4.15 | 0.00000           | **** |
| Control:DOX 1.5-Control:T0  | -1.06       | -2.37                    | 0.24  | 0.22905           | NS   |
| CDD:DOX 1.5-Control:T0      | -4.00       | -5.30                    | -2.69 | 0.00000           | **** |
| CDD:TGN-Control:TGN         | 0.57        | -0.74                    | 1.87  | 0.96787           | NS   |
| CDD:VAN 20-Control:VAN 20   | -6.84       | -8.14                    | -5.53 | 0.00000           | **** |
| CDD:RIF 2.5-Control:RIF 2.5 | -2.72       | -4.02                    | -1.41 | 0.00000           | **** |
| CDD:LIN 5-Control:LIN 5     | -2.77       | -4.07                    | -1.46 | 0.00000           | **** |
| CDD:MXF 1.5-Control:MXF 1.5 | -2.57       | -3.87                    | -1.26 | 0.00000           | **** |
| CDD:DAP 30-Control:DAP 30   | -1.95       | -3.26                    | -0.65 | 0.00028           | **   |
| CDD:DOX 1.5-Control:DOX 1.5 | -2.93       | -4.24                    | -1.63 | 0.00000           | **** |

Table 5. ATCC 35984 (MRSE). Biomass assay (% of T0 control). Tukey HSD results.

| Comparisons                 | Differences | 95% confidence intervals |       | Adjusted p values |      |
|-----------------------------|-------------|--------------------------|-------|-------------------|------|
|                             |             | Lower                    | Upper |                   |      |
| CDD:T0-Control:T0           | -88.5       | -118.3                   | -58.8 | 0.00000           | **** |
| Control:TGN-Control:T0      | 23.4        | -6.3                     | 53.1  | 0.27459           | NS   |
| CDD:TGN-Control:T0          | -11.3       | -41.0                    | 18.4  | 0.99056           | NS   |
| Control:VAN 20-Control:T0   | 15.9        | -13.8                    | 45.6  | 0.84551           | NS   |
| CDD:VAN 20-Control:T0       | -81.6       | -111.3                   | -51.9 | 0.00000           | **** |
| Control:RIF 2.5-Control:T0  | 4.7         | -25.0                    | 34.4  | 1.00000           | NS   |
| CDD:RIF 2.5-Control:T0      | -82.7       | -112.4                   | -52.9 | 0.00000           | **** |
| Control:LIN 5-Control:T0    | 2.3         | -27.4                    | 32.0  | 1.00000           | NS   |
| CDD:LIN 5-Control:T0        | -77.9       | -107.6                   | -48.2 | 0.00000           | **** |
| Control:MXF 1.5-Control:T0  | 5.2         | -24.5                    | 34.9  | 1.00000           | NS   |
| CDD:MXF 1.5-Control:T0      | -78.1       | -107.8                   | -48.4 | 0.00000           | **** |
| Control:DAP 30-Control:T0   | 21.2        | -8.5                     | 50.9  | 0.42780           | NS   |
| CDD:DAP 30-Control:T0       | -84.0       | -113.7                   | -54.3 | 0.00000           | **** |
| Control:DOX 1.5-Control:T0  | 3.3         | -26.4                    | 33.0  | 1.00000           | NS   |
| CDD:DOX 1.5-Control:T0      | -85.2       | -114.9                   | -55.5 | 0.00000           | **** |
| CDD:TGN-Control:TGN         | -34.7       | -64.4                    | -5.0  | 0.00965           | **   |
| CDD:VAN 20-Control:VAN 20   | -97.5       | -127.2                   | -67.8 | 0.00000           | **** |
| CDD:RIF 2.5-Control:RIF 2.5 | -87.3       | -117.0                   | -57.6 | 0.00000           | **** |
| CDD:LIN 5-Control:LIN 5     | -80.3       | -110.0                   | -50.6 | 0.00000           | **** |
| CDD:MXF 1.5-Control:MXF 1.5 | -83.2       | -112.9                   | -53.5 | 0.00000           | **** |
| CDD:DAP 30-Control:DAP 30   | -105.2      | -134.9                   | -75.5 | 0.00000           | **** |
| CDD:DOX 1.5-Control:DOX 1.5 | -88.6       | -118.3                   | -58.9 | 0.00000           | **** |

Table 6. ATCC 47076 (*E. coli*). Log<sub>10</sub> CFU counts. Tukey HSD results.

| Comparisons                     | Differences | 95% confidence intervals |       | Adjusted p values |      |
|---------------------------------|-------------|--------------------------|-------|-------------------|------|
|                                 |             | Lower                    | Upper |                   |      |
| CDD:T0-Control:T0               | -1.24       | -2.40                    | -0.08 | 0.02515           | *    |
| Control:TGN-Control:T0          | -0.10       | -1.26                    | 1.06  | 1.00000           | NS   |
| CDD:TGN-Control:T0              | -0.33       | -1.49                    | 0.83  | 0.99942           | NS   |
| Control:CEF 3.8-Control:T0      | -2.06       | -3.31                    | -0.81 | 0.00004           | **** |
| CDD:CEF 3.8-Control:T0          | -7.29       | -8.54                    | -6.04 | 0.00000           | **** |
| Control:CEF 42-Control:T0       | -7.05       | -8.21                    | -5.89 | 0.00000           | **** |
| CDD:CEF 42-Control:T0           | -7.29       | -8.45                    | -6.14 | 0.00000           | **** |
| Control:CIP 1.625-Control:T0    | -3.21       | -4.36                    | -2.05 | 0.00000           | **** |
| CDD:CIP 1.625-Control:T0        | -7.19       | -8.35                    | -6.03 | 0.00000           | **** |
| Control:CST 2.5-Control:T0      | -1.23       | -2.48                    | 0.02  | 0.05593           | NS   |
| CDD:CST 2.5-Control:T0          | -6.80       | -8.05                    | -5.55 | 0.00000           | **** |
| Control:MER 0.25-Control:T0     | -1.21       | -2.46                    | 0.03  | 0.06433           | NS   |
| CDD:MER 0.25-Control:T0         | -7.33       | -8.58                    | -6.08 | 0.00000           | **** |
| Control:MER 6.25-Control:T0     | -6.81       | -7.97                    | -5.65 | 0.00000           | **** |
| CDD:MER 6.25-Control:T0         | -7.27       | -8.43                    | -6.11 | 0.00000           | **** |
| CDD:TGN-Control:TGN             | -0.23       | -1.39                    | 0.93  | 0.99999           | NS   |
| CDD:CEF 3.8-Control:CEF 3.8     | -5.23       | -6.56                    | -3.89 | 0.00000           | **** |
| CDD:CEF 42-Control:CEF 42       | -0.24       | -1.40                    | 0.92  | 0.99999           | NS   |
| CDD:CIP 1.625-Control:CIP 1.625 | -3.98       | -5.14                    | -2.83 | 0.00000           | **** |
| CDD:CST 2.5-Control:CST 2.5     | -5.57       | -6.90                    | -4.23 | 0.00000           | **** |
| CDD:MER 0.25-Control:MER 0.25   | -6.11       | -7.45                    | -4.78 | 0.00000           | **** |
| CDD:MER 6.25-Control:MER 6.25   | -0.46       | -1.62                    | 0.70  | 0.98238           | NS   |

Table 7. ATCC 47076 (*E. coli*). Biomass assay (% of T0 control). Tukey HSD results.

| Comparisons                     | Differences | 95% confidence intervals |       | Adjusted p values |      |
|---------------------------------|-------------|--------------------------|-------|-------------------|------|
|                                 |             | Lower                    | Upper |                   |      |
| CDD:T0-Control:T0               | -80.3       | -126.2                   | -34.3 | 0.00001           | **** |
| Control:TGN-Control:T0          | 16.1        | -29.8                    | 62.0  | 0.99498           | NS   |
| CDD:TGN-Control:T0              | 13.5        | -32.4                    | 59.4  | 0.99924           | NS   |
| Control:CEF 3.8-Control:T0      | -61.7       | -111.3                   | -12.1 | 0.00415           | **   |
| CDD:CEF 3.8-Control:T0          | -99.1       | -148.7                   | -49.5 | 0.00000           | **** |
| Control:CEF 42-Control:T0       | -86.0       | -131.9                   | -40.1 | 0.00000           | **** |
| CDD:CEF 42-Control:T0           | -92.5       | -138.5                   | -46.6 | 0.00000           | **** |
| Control:CIP 1.625-Control:T0    | -48.3       | -94.3                    | -2.4  | 0.03043           | *    |
| CDD:CIP 1.625-Control:T0        | -97.3       | -143.2                   | -51.4 | 0.00000           | **** |
| Control:CST 2.5-Control:T0      | -24.6       | -70.5                    | 21.4  | 0.84212           | NS   |
| CDD:CST 2.5-Control:T0          | -84.9       | -130.8                   | -38.9 | 0.00000           | **** |
| Control:MER 0.25-Control:T0     | 4.8         | -44.8                    | 54.4  | 1.00000           | NS   |
| CDD:MER 0.25-Control:T0         | -93.4       | -143.0                   | -43.8 | 0.00000           | **** |
| Control:MER 6.25-Control:T0     | -82.9       | -128.9                   | -37.0 | 0.00001           | **** |
| CDD:MER 6.25-Control:T0         | -93.8       | -139.7                   | -47.8 | 0.00000           | **** |
| CDD:TGN-Control:TGN             | -2.6        | -48.5                    | 43.3  | 1.00000           | NS   |
| CDD:CEF 3.8-Control:CEF 3.8     | -37.4       | -90.4                    | 15.7  | 0.45113           | NS   |
| CDD:CEF 42-Control:CEF 42       | -6.6        | -52.5                    | 39.4  | 1.00000           | NS   |
| CDD:CIP 1.625-Control:CIP 1.625 | -49.0       | -94.9                    | -3.0  | 0.02665           | *    |
| CDD:CST 2.5-Control:CST 2.5     | -60.3       | -106.2                   | -14.4 | 0.00194           | **   |
| CDD:MER 0.25-Control:MER 0.25   | -98.2       | -151.2                   | -45.2 | 0.00000           | **** |
| CDD:MER 6.25-Control:MER 6.25   | -10.8       | -56.7                    | 35.1  | 0.99995           | NS   |



### 3 Two-way ANOVAs results

Table 8

*ATCC 33591 (MRSA). Two-way ANOVA results using the log<sub>10</sub> CFU counts as the criterion*

| Predictor                           | Sum of Squares | <i>df</i> | Mean Square | <i>F</i> | <i>p</i> | partial $\eta^2$ | partial $\eta^2$<br>90% CI<br>[LL, UL] |
|-------------------------------------|----------------|-----------|-------------|----------|----------|------------------|----------------------------------------|
| (Intercept)                         | 1449.57        | 1         | 1449.57     | 8707.75  | .000     |                  |                                        |
| CDD exposure                        | 59.28          | 1         | 59.28       | 356.11   | .000     | .92              | [.86, .94]                             |
| Antibiotics exposure                | 147.16         | 6         | 24.53       | 147.34   | .000     | .97              | [.93, .97]                             |
| CDD exposure x Antibiotics exposure | 21.22          | 6         | 3.54        | 21.25    | .000     | .80              | [.63, .83]                             |
| Error                               | 5.33           | 32        | 0.17        |          |          |                  |                                        |

*Note.* LL and UL represent the lower-limit and upper-limit of the partial  $\eta^2$  confidence interval, respectively.

Table 9

*ATCC 33591 (MRSA). Two-way ANOVA results using the biomass (% of T0 control) as the criterion*

| Predictor                           | Sum of Squares | <i>df</i> | Mean Square | <i>F</i> | <i>p</i> | partial $\eta^2$ | partial $\eta^2$<br>90% CI<br>[LL, UL] |
|-------------------------------------|----------------|-----------|-------------|----------|----------|------------------|----------------------------------------|
| (Intercept)                         | 212225.00      | 1         | 212225.00   | 5587.20  | .000     |                  |                                        |
| CDD exposure                        | 90525.70       | 1         | 90525.70    | 2383.25  | .000     | .99              | [.98, .99]                             |
| Antibiotics exposure                | 24406.45       | 6         | 4067.74     | 107.09   | .000     | .95              | [.91, .96]                             |
| CDD exposure x Antibiotics exposure | 13014.65       | 6         | 2169.11     | 57.11    | .000     | .91              | [.83, .92]                             |
| Error                               | 1291.46        | 34        | 37.98       |          |          |                  |                                        |

*Note.* LL and UL represent the lower-limit and upper-limit of the partial  $\eta^2$  confidence interval, respectively.

Table 10

*ATCC 35984 (MRSE). Two-way ANOVA results using the log<sub>10</sub> CFU counts as the criterion*

| Predictor                                    | Sum<br>of<br>Squares | <i>df</i> | Mean<br>Square | <i>F</i> | <i>p</i> | partial $\eta^2$ | partial $\eta^2$<br>90% CI<br>[LL, UL] |
|----------------------------------------------|----------------------|-----------|----------------|----------|----------|------------------|----------------------------------------|
| (Intercept)                                  | 661.86               | 1         | 661.86         | 3992.47  | .000     |                  |                                        |
| CDD<br>exposure                              | 88.73                | 1         | 88.73          | 535.24   | .000     | .94              | [.91, .96]                             |
| Antibiotics<br>exposure                      | 147.56               | 7         | 21.08          | 127.16   | .000     | .97              | [.93, .97]                             |
| CDD<br>exposure x<br>Antibiotics<br>exposure | 42.68                | 7         | 6.10           | 36.78    | .000     | .89              | [.78, .90]                             |
| Error                                        | 5.30                 | 32        | 0.17           |          |          |                  |                                        |

*Note.* LL and UL represent the lower-limit and upper-limit of the partial  $\eta^2$  confidence interval, respectively.

Table 11

*ATCC 35984 (MRSE). Two-way ANOVA results using the biomass (% of T0 control) as the criterion*

| Predictor                                    | Sum<br>of<br>Squares | <i>df</i> | Mean<br>Square | <i>F</i> | <i>p</i> | partial $\eta^2$ | partial $\eta^2$<br>90% CI<br>[LL, UL] |
|----------------------------------------------|----------------------|-----------|----------------|----------|----------|------------------|----------------------------------------|
| (Intercept)                                  | 221395.68            | 1         | 221395.68      | 2275.06  | .000     |                  |                                        |
| CDD<br>exposure                              | 83023.52             | 1         | 83023.52       | 853.15   | .000     | .96              | [.94, .97]                             |
| Antibiotics<br>exposure                      | 10680.41             | 7         | 1525.77        | 15.68    | .000     | .77              | [.57, .81]                             |
| CDD<br>exposure x<br>Antibiotics<br>exposure | 4683.78              | 7         | 669.11         | 6.88     | .000     | .60              | [.30, .65]                             |
| Error                                        | 3114.06              | 32        | 97.31          |          |          |                  |                                        |

*Note.* LL and UL represent the lower-limit and upper-limit of the partial  $\eta^2$  confidence interval, respectively.

Table 12

*ATCC 47076 (E. coli). Two-way ANOVA results using the log<sub>10</sub> CFU counts as the criterion*

| Predictor                           | Sum of Squares | <i>df</i> | Mean Square | <i>F</i> | <i>p</i> | partial $\eta^2$ | partial $\eta^2$<br>90% CI<br>[LL, UL] |
|-------------------------------------|----------------|-----------|-------------|----------|----------|------------------|----------------------------------------|
| (Intercept)                         | 801.94         | 1         | 801.94      | 3518.29  | .000     |                  |                                        |
| CDD exposure                        | 142.93         | 1         | 142.93      | 627.07   | .000     | .95              | [.92, .97]                             |
| Antibiotics exposure                | 178.80         | 5         | 35.76       | 156.89   | .000     | .96              | [.93, .97]                             |
| CDD exposure x Antibiotics exposure | 53.17          | 5         | 10.63       | 46.65    | .000     | .89              | [.78, .91]                             |
| Error                               | 6.84           | 30        | 0.23        |          |          |                  |                                        |

*Note.* LL and UL represent the lower-limit and upper-limit of the partial  $\eta^2$  confidence interval, respectively.

Table 13

*ATCC 47076 (E. coli). Two-way ANOVA results using the biomass (% of T0 control) as the criterion*

| Predictor                           | Sum of Squares | <i>df</i> | Mean Square | <i>F</i> | <i>p</i> | partial $\eta^2$ | partial $\eta^2$<br>90% CI<br>[LL, UL] |
|-------------------------------------|----------------|-----------|-------------|----------|----------|------------------|----------------------------------------|
| (Intercept)                         | 127753.01      | 1         | 127753.01   | 355.84   | .000     |                  |                                        |
| CDD exposure                        | 33719.94       | 1         | 33719.94    | 93.92    | .000     | .75              | [.59, .81]                             |
| Antibiotics exposure                | 47008.62       | 5         | 9401.72     | 26.19    | .000     | .80              | [.64, .84]                             |
| CDD exposure x Antibiotics exposure | 8678.67        | 5         | 1735.73     | 4.83     | .002     | .43              | [.12, .52]                             |
| Error                               | 11488.71       | 32        | 359.02      |          |          |                  |                                        |

*Note.* LL and UL represent the lower-limit and upper-limit of the partial  $\eta^2$  confidence interval, respectively.
